# Supplementary material for: β-Cell Obligation in α-Cell Glucagon Response to Low Glucose
Source: Research Square preprint supplement (doi:10.21203/rs.3.rs-9039050/v1), 2026-04-15
Supplement: Supplementary file 1 [file 753516de7967342d81dfd496.pdf]

**Extended Data Table 1**  
Human donor information

| Date of cell purification | Internal ID | Islet isolation center     | RRID         | Unique identifier | Age | Gender | BMI  | HbA1c (%) | Cause of death              |
|---------------------------|-------------|----------------------------|--------------|-------------------|-----|--------|------|-----------|-----------------------------|
| 02/03/2022                | Can-11      | University of Alberta      | SAMN26419385 | R434              | 50  | Female | 24,2 | 5,70      | n.d                         |
| 04/05/2022                | Can-12      | University of Alberta      | SAMN28034084 | R443              | 25  | Female | 23   | 5,10      | Head Trauma                 |
| 08/08/2022                | Gen-1       | Geneva University Hospital | n.d          | HI-37             | 46  | Male   | 24,9 | n.d       | n.d                         |
| 18/03/2022                | IIDP-58     | IIDP                       | SAMN26646319 |                   | 20  | Male   | 20,5 | 4,60      | Head Trauma                 |
| 22/07/2022                | Can-13      | University of Alberta      | n.d.         | R451              | 56  | Female | 24   | 6,00      | n.d                         |
| 22/07/2022                | IIDP-60     | IIDP                       | SAMN29794444 |                   | 45  | Male   | 24,8 | 5,30      | Cerebrovascular/stroke      |
| 12/08/2022                | IIDP-61     | IIDP                       | SAMN30181459 |                   | 38  | Male   | 28,8 | 6,10      | Head Trauma                 |
| 11/11/2022                | IIDP-63     | IIDP                       | SAMN31618442 |                   | 34  | Male   | 25,8 | 5,00      | Head Trauma                 |
| 16/12/2022                | IIDP-64     | IIDP                       | SAMN32119553 |                   | 40  | Female | 32,9 | 5,70      | Anoxia                      |
| 15/11/2022                | Can-14      | University of Alberta      | SAMN31717214 | R464              | 60  | Male   | 27,7 | 5,30      | n.d.                        |
| 06/04/2023                | IIDP-70     | IIDP                       | SAMN34033792 |                   | 39  | Female | 33,4 | 5,00      | Head Trauma                 |
| 28/07/2023                | IIDP-73     | IIDP                       | SAMN36510137 |                   | 63  | Male   | 32,1 | 6,10      | Anoxia                      |
| 17/10/2023                | IIDP-75     | IIDP                       | SAMN37735327 |                   | 54  | Female | 23,3 | 5,60      | Anoxia                      |
| 11/01/2024                | IIDP-77     | IIDP                       | SAMN39281578 |                   | 44  | Male   | 19,7 | 5,10      | Cardiovascular              |
| 15/08/2024                | Gen-7       | Geneva University Hospital | n.d          | HI-57             | 58  | Female | 28,3 | n.d       | Cerebrovascular/stroke      |
| 25/09/2024                | IIDP-93     | IIDP                       | SAMN43879233 |                   | 63  | Male   | 19,4 | 5,50      | Head Trauma                 |
| 24/10/2024                | IIDP-95     | IIDP                       | SAMN44269935 |                   | 29  | Male   | 26,5 | 5,40      | Cerebrovascular/stroke      |
| 24/10/2024                | IIDP-96     | IIDP                       | SAMN44337332 |                   | 31  | Female | 16,3 | 6,00      | Anoxia                      |
| 31/10/2024                | IIDP-97     | IIDP                       | SAMN44405720 |                   | 37  | Male   | 26,8 | 5,40      | Head Trauma                 |
| 22/11/2024                | IIDP-99     | IIDP                       | SAMN44779828 |                   | 59  | Female | 26,3 | 5,50      | Cerebrovascular/stroke      |
| 27/02/2025                | IIDP-107    | IIDP                       | SAMN46898244 |                   | 43  | Female | 21,8 | 5,50      | Anoxia                      |
| 09/05/2025                | IIDP-111    | IIDP                       | SAMN48329018 |                   | 42  | Female | 22,7 | 5,30      | Anoxia                      |
| 23/05/2025                | IIDP-112    | IIDP                       | SAMN48585017 |                   | 50  | Male   | 27,9 | 4,60      | Intraparenchymal hemorrhage |
| 19/06/2025                | IIDP-114    | IIDP                       | SAMN49091687 |                   | 62  | Female | 24   | 5,50      | Cerebrovascular/stroke      |
| 07/08/2025                | IIDP-115    | IIDP                       | SAMN50439434 |                   | 21  | Male   | 26,9 | 5,10      | Anoxia                      |
| 10/10/2025                | IIDP-119    | IIDP                       | SAMN52384438 |                   | 26  | Male   | 26,5 | 5,20      | Anoxia                      |

n.d. = non defined

## Extended Data Table 2

List of RT-qPCR primers

| <b>Gene</b>         | <b>Primer sequence forward</b> | <b>Primer sequence reverse</b>  |
|---------------------|--------------------------------|---------------------------------|
| <b><i>RN18S</i></b> | 5' CAGCAGGCGCGCAAATTACC 3'     | 5'GGCACCAGACTTGCCCTCCA 3'       |
| <b><i>INS</i></b>   | 5'CGCAGCCTTTGTGAACCAACAC 3'    | 5'AAGCCTCGTTCCCCGCACACTA 3'     |
| <b><i>GCG</i></b>   | 5' AGCTTCCCAGGCAGACCCACTC 3'   | 5' ATGGCGCTTGTCTCCTCGTTCATC 3'  |
| <b><i>PPY</i></b>   | 5' TCTCCCTGCTGCTCCTGTCCAC 3'   | 5' CCATCTGCTCTGGTGTGGCATT 3'    |
| <b><i>SST</i></b>   | 5' GCTGCTGTCTGAACCCAACCAGA 3'  | 5' TCAAGCCTCATTTTCATCCTGCTCA 3' |
