# Supplementary material for: β-Cell Obligation in α-Cell Glucagon Response to Low Glucose
Source: Research Square preprint supplement (doi:10.21203/rs.3.rs-9039050/v1), 2026-04-15
Supplement: Supplementary file 2 [file 9f83b92688b33025975c6146.pdf]

# **$\beta$ -Cell Obligation in $\alpha$ -Cell Glucagon Response to Low Glucose**

**By**

Eva Bru-Tari\*#, Marta Perez-Frances\*, Fabrizio Thorel and Pedro L. Herrera#

Dept. of Genetic Medicine & Development, iGE3 and Centre facultaire du diabète,  
Faculty of Medicine, University of Geneva, 1206 Geneva, Switzerland

# Supplemental Figure 1

a.

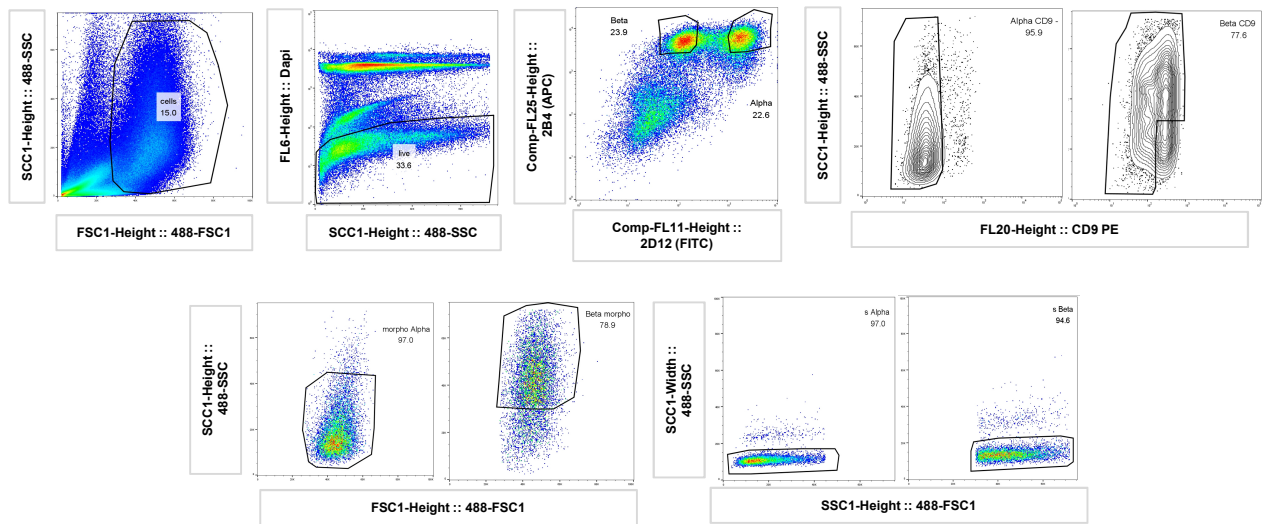

b.

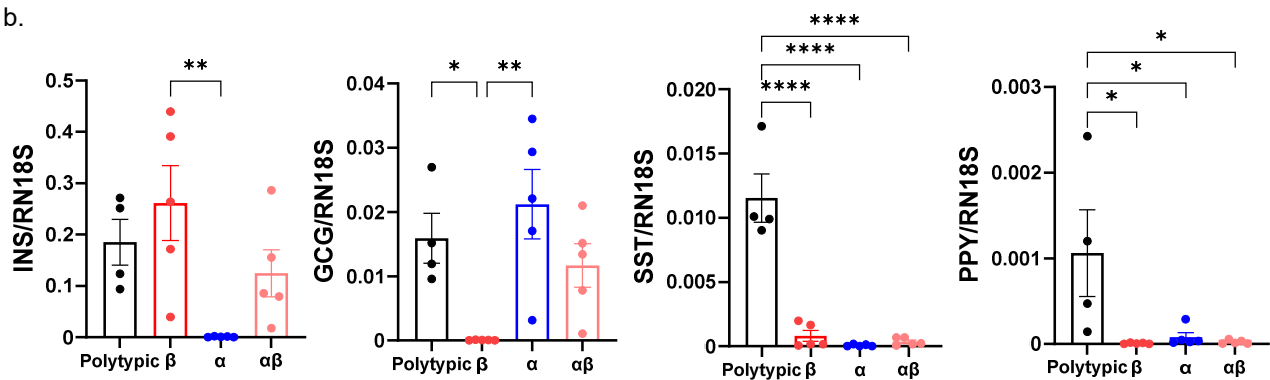

c.

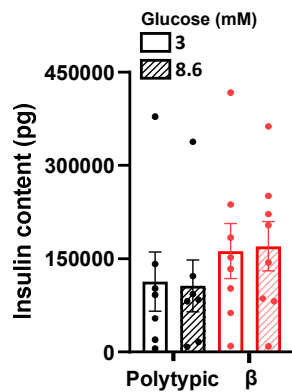

d.

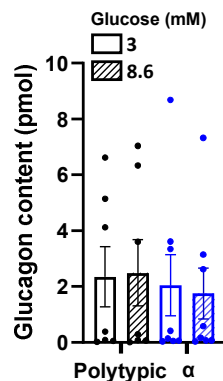

e.

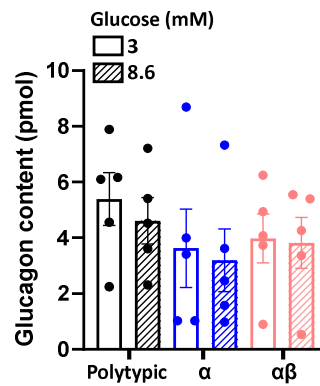

f.

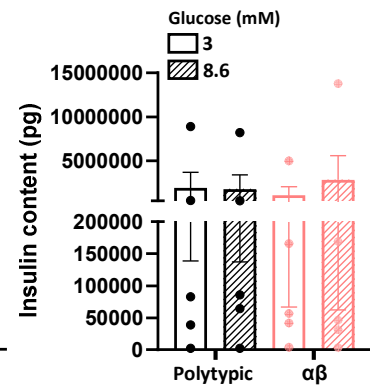

**Supplemental Figure 1. Characterization of FACS-purified human  $\alpha$ - and  $\beta$ -cell populations and pseudoislet hormone content.** **a.** FACS strategy used to purify human  $\beta$ - and  $\alpha$ -cells. Representative plots show cells labelled with the pan-endocrine marker H1C1-2B4, the non- $\beta$ -cell endocrine marker H1C3-2D12 and the marker CD9, allowing high purity isolation of  $\alpha$ - and  $\beta$ -cells. **b.** RT-qPCR analysis of *INS*, *GCG*, *SST* and *PPY* expression on polytypic,  $\alpha$ -pseudoislets and  $\alpha\beta$ -pseudoislets. Data are normalized to the housekeeping gene *RN18S*. N=4-5 donors. **c.** Total insulin content of polytypic (black) and  $\beta$ -pseudoislets (red) after stimulation at 3 mM and 8.6 mM glucose (from figure 1d). **d.** Total glucagon content of polytypic (black) and  $\alpha$ -pseudoislets (blue) after stimulation at 3 mM and 8.6 mM glucose (from figure 1f). **e.** Total glucagon content of polytypic,  $\alpha$ - and  $\alpha\beta$ -pseudoislets (from figure 2d). **f.** Total insulin content of polytypic and  $\alpha\beta$ -pseudoislets (from figure 2d). All data are shown as mean $\pm$ sem. One-way ANOVA with Turkey's multiple comparison test (b, c, d). Two-way ANOVA with Turkey's multiple comparison test (e, f). Raw data are provided as Source data Supplemental Figure 1.

## Supplemental Figure 2

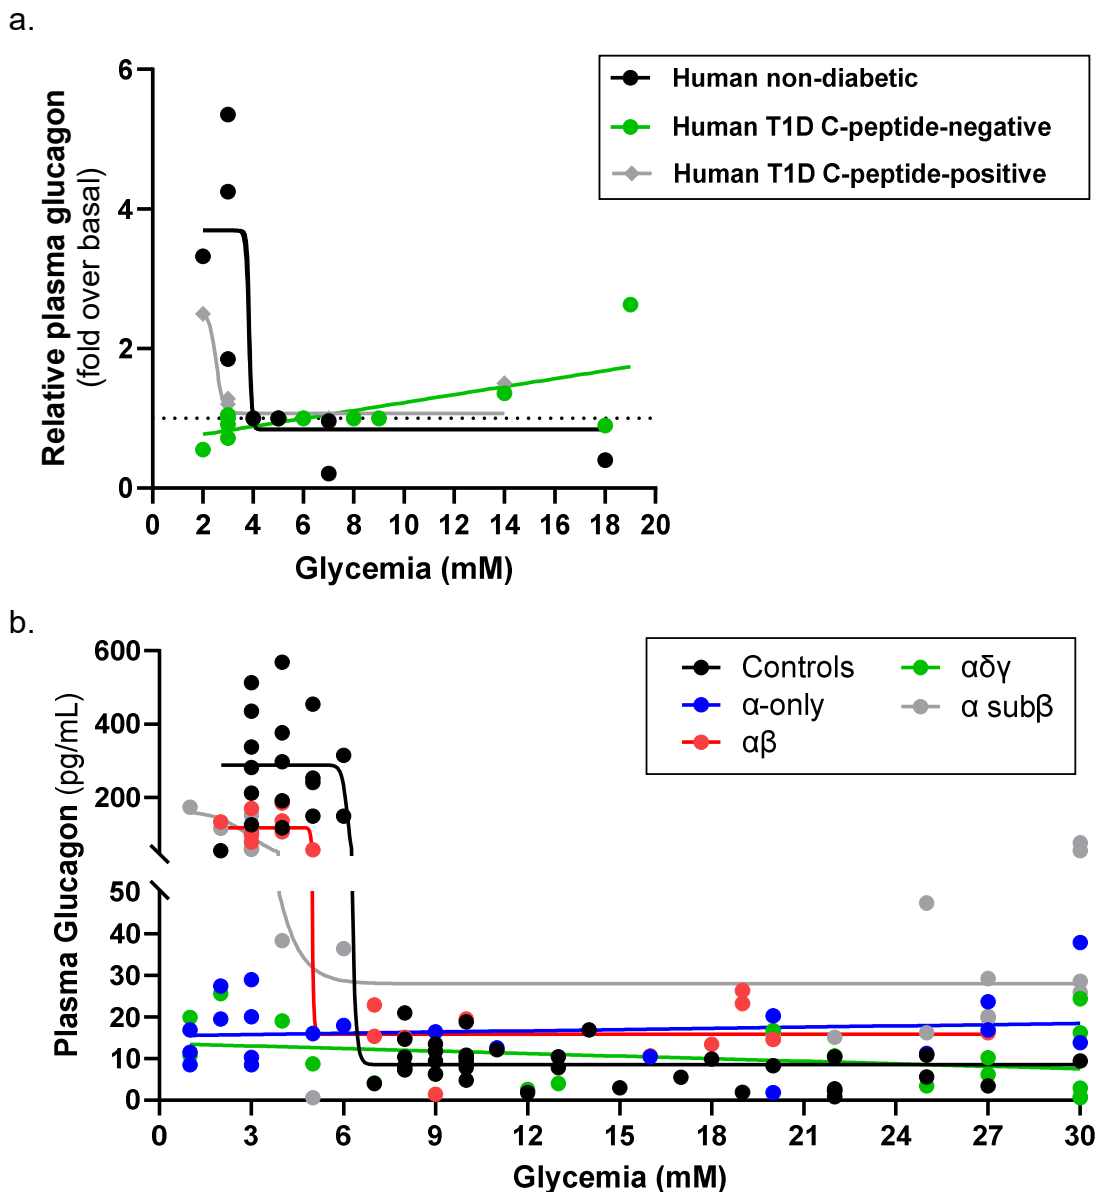

**Supplemental Figure 2. Integrated human and mouse analyses correlate the persistence of residual  $\beta$ -cells with preserved counterregulatory glucagon responses.** **a.** Human meta-analysis. Data were compiled from 9 published studies reporting concurrent plasma glucagon and glucose measurements in non-diabetic and T1D subjects. T1D participants stratified by residual  $\beta$ -cell function (C-peptide-positive, grey; C-peptide negative, green). Values were converted to common units and normalized to each study's basal glucagon level to yield fold-change responses across the glycemic range. Each point represents a study-level mean. Non-diabetic subjects and T1D participants with detectable circulating C-peptide exhibited glucose-dependent levels of glucagon and were therefore analyzed using a four-parameter logistic model (non-diabetic,  $R^2 = 0.76$ ; T1D C-peptide-positive,  $R^2 = 0.865$ ). In contrast, T1D C-peptide-negative glucagon response lacked a sigmoidal relationship and displayed a significant linear slope ( $R^2 = 0.459$ ;  $P = 0.0039$  vs zero slope). Model fits were compared by extra-sum-of-squares F-test, and goodness-of-fit was evaluated by  $R^2$ . Dashed line indicates fold over basal = 1. **b.** Mouse data generated for this study. Plasma glucagon levels (pg/ml) were measured across a glucose range of 0-30 mM in control (Ctrl, black,  $n=20$ ), " $\alpha$ " (blue,  $n=22$ ), " $\alpha\beta$ " (green,  $n=9$ ), " $\alpha\delta\gamma$ " (red,  $n=9$ ) and " $\alpha$  sub $\beta$ " mice (grey,  $n=12$ ). Data was analyzed using a four-parameter logistic model (4PL, control:  $R^2 = 0.72$ ; " $\alpha\beta$ ":  $R^2 = 0.84$ ; " $\alpha$  sub $\beta$ ":  $R^2 = 0.74$ ). " $\alpha$ " and " $\alpha\delta\gamma$ " displayed a linear slope (" $\alpha$ ":  $R^2 = 0.02$ ; " $\alpha\delta\gamma$ ":  $R^2 = 0.08$ ). Model fits were compared by extra-sum-of-squares F-test, and goodness-of-fit was evaluated by  $R^2$ . Raw data provided as Source data Supplemental Figure 2.

### Supplemental Figure 3

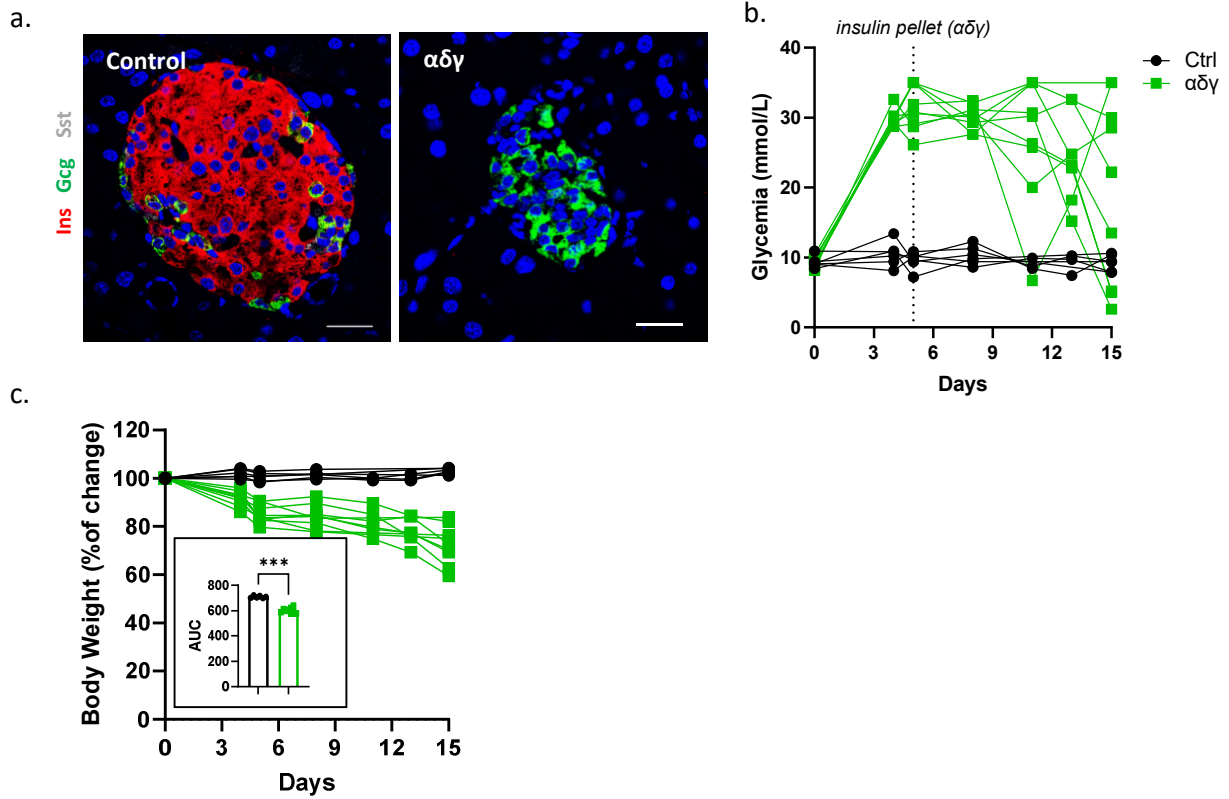

**Supplemental Figure 3. Selective and efficient ablation of target cell populations in  $\alpha\delta\gamma$  mice.** **a.** Immunofluorescence staining of control and “ $\alpha\delta\gamma$ ” mice. INS: red; GCG: green; SST: gray. Scale bar: 20 $\mu$ m. **b.** Glycemia over 15 days after first DT injection in control (Ctrl, black, n=6) and “ $\alpha\delta\gamma$ ” (green, n=9) mice. **c.** Percentage of body weight change in control (black, n=6) and “ $\alpha\delta\gamma$ ” (green, n=9) mice. Inset: Area under the curve (AUC) of body weight change. Two-tailed Mann-Whitney test. All data are shown as mean $\pm$ sem. Raw data are provided as Source data Supplementary Figure 3.

## Supplemental Figure 4

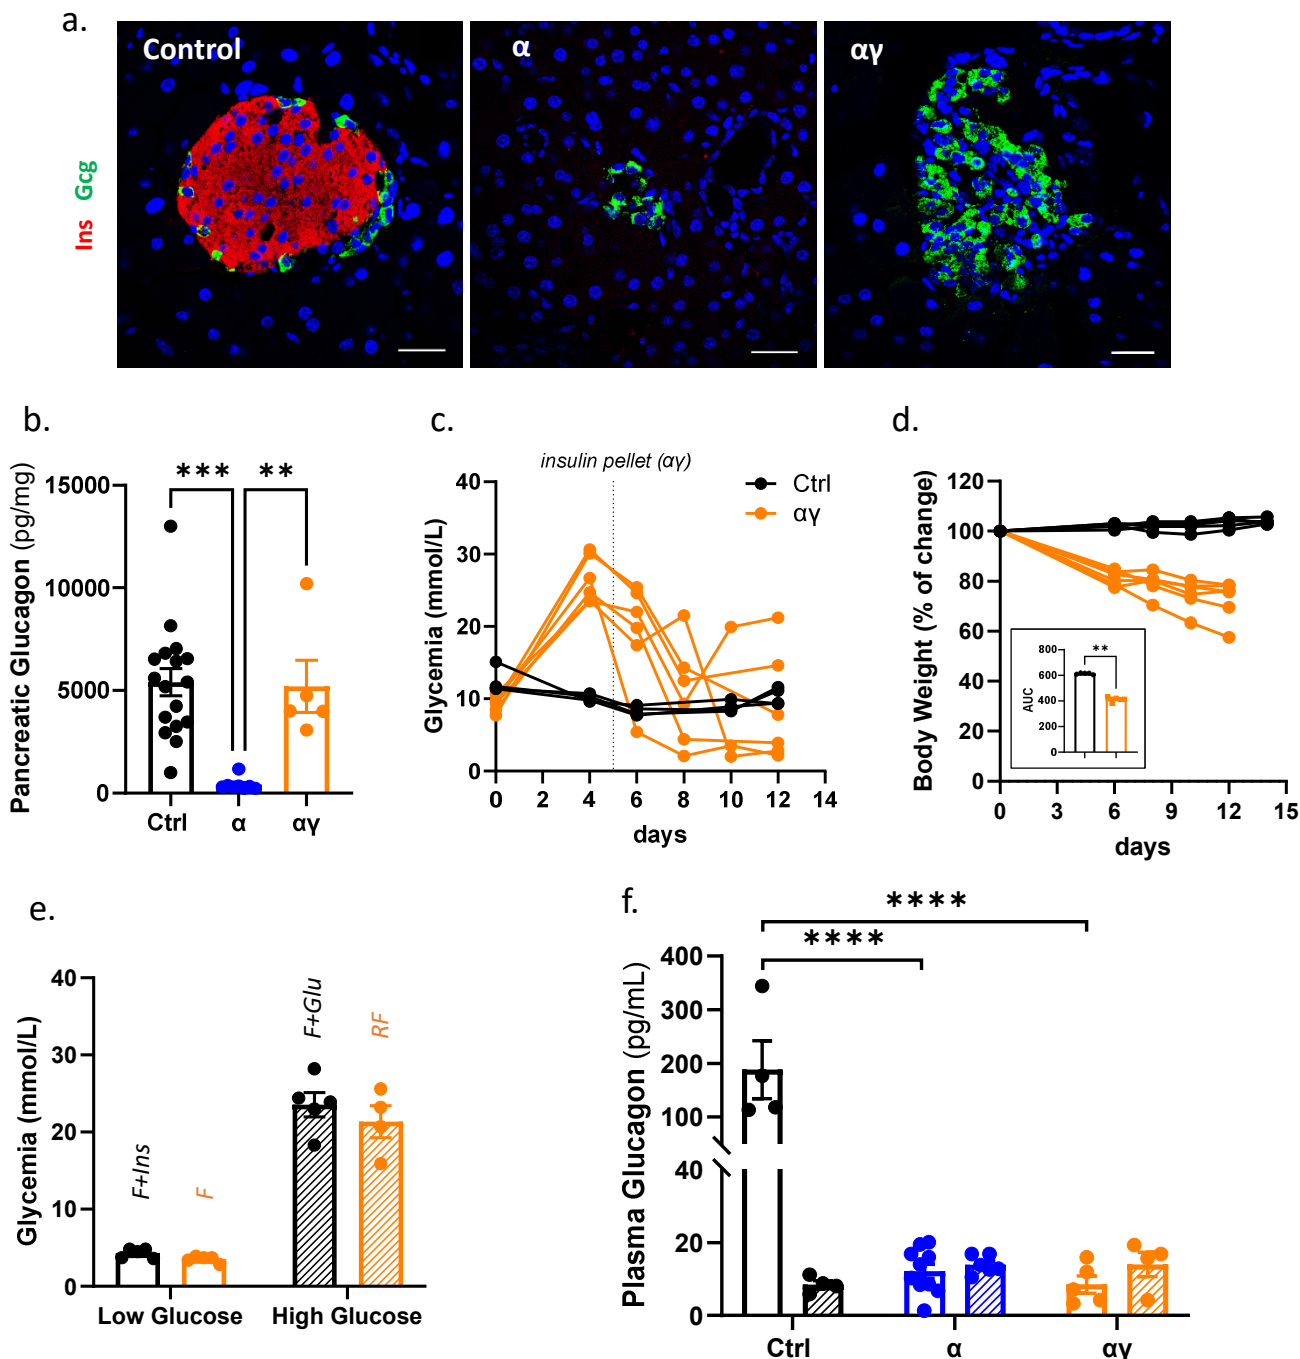

### Supplemental Figure 4. $\alpha\gamma$ mice maintain normal pancreatic glucagon content but display impaired counterregulatory glucagon secretion.

**a.** Immunofluorescence staining of control, " $\alpha$ " and " $\alpha\gamma$ " mice. INS: red; GCG: green; SST: gray. Scale bar: 20 $\mu$ m. **b.** Pancreatic glucagon content (pg/mg) in control (black, n=17), " $\alpha$ " (blue, n=8) and " $\alpha\gamma$ " (orange, n=5) mice. **c.** Glycemia over 15 days after first DT injection in control (Ctrl, black, n=4) and " $\alpha\gamma$ " (orange, n=6) mice. **d.** Percentage of body weight change in control (black, n=5) and " $\alpha\gamma$ " (orange, n=6) mice. Inset: Area under the curve (AUC) of body weight change. **e.** Glycemia of control (black, n=5) and " $\alpha\gamma$ " (orange, n=4) mice before blood collection at low (dashed bar) and high (fill bar) glucose levels. Mice were fasted (F) or random fed (RF) and injected with intra-peritoneal insulin (Ins) or glucose (Glu). **f.** Plasma glucagon (pg/ml) in control (black, n=4), " $\alpha$ " (blue, Low G: n=10; High G: n=6) and " $\alpha\gamma$ " (orange, Low G: n=5; High G: n=4) at low (dashed bar) and high (continuous bar) glucose levels. Data from f: " $\alpha$ " was used as reference from figure 3f. Statistical comparisons between groups in at each glucose condition were performed using one-way ANOVA with Tukey's post-hoc test (\*). Comparisons between low vs high glucose within each group were performed using two-tailed Mann Whitney test (#). One-way ANOVA with multiple comparisons test (e); two-tailed Mann-Whitney test (b, d). All data are shown as mean $\pm$ sem. Raw data are provided as Source data Supplementary Figure 4.
